# Supplementary material
Source: Springer Nature journal article supplement (https://www.springermedizin.de/resource/supplementary/13012_2011_482_MOESM5_ESM.pdf/9630076)
Supplement: MOESM5 [file 9630076]

**Additional file 5. Membership values (%) for each construct to each domain cluster defined in the cluster analysis.**

(Values <1% removed; \* Construct identified as duplicate in original framework; SPRI = Social / Professional Role and Identity, BaCa = Beliefs about Capabilities, BaCo = Beliefs about Consequences, Rein. = Reinforcement, Int. = Intentions, Opt. = Optimism, MADP = Memory, Attention, and Decision Processes, EC = Environmental Context and Resources, SI = Social Influences, Emot. = Emotion, BR = Behavioural Regulation, Moderators of IB gap = Moderators of Intention-Behaviour Gap)

| Original Domain                         | Construct                | Skills | SPRI  | BaCa | Opt.  | BaCo  | Rein. | Int. | Goals | MADP  | EC    | SI    | Emot. | BR    |
|-----------------------------------------|--------------------------|--------|-------|------|-------|-------|-------|------|-------|-------|-------|-------|-------|-------|
| Knowledge                               | Knowledge                | 10.31  | 4.32  | 5.31 | 4.29  | 9.36  | 2.61  | 6.14 | 4.80  | 18.46 | 19.21 | 2.11  | 1.80  | 11.27 |
|                                         | Schemas                  | 3.49   | 1.61  | 2.84 | 14.63 | 21.03 | 1.23  | 2.91 | 1.93  | 34.58 | 9.16  |       | 1.25  | 4.35  |
|                                         | Mindset                  |        |       | 1.44 | 59.99 | 21.32 |       | 2.01 |       | 3.17  | 4.03  |       | 1.99  | 1.88  |
|                                         | Illness representations  |        |       |      | 5.32  | 85.12 |       |      |       | 2.60  | 2.49  |       |       |       |
|                                         | Procedural knowledge     | 40.37  | 2.77  | 3.82 | 2.24  | 3.35  | 1.71  | 4.08 | 2.84  | 15.93 | 12.40 | 1.22  | 1.42  | 7.86  |
| Skills                                  | Skills                   | 99.89  |       |      |       |       |       |      |       |       |       |       |       |       |
|                                         | Competence               | 99.95  |       |      |       |       |       |      |       |       |       |       |       |       |
|                                         | Ability                  | 99.35  |       |      |       |       |       |      |       |       |       |       |       |       |
|                                         | Skill assessment         | 98.32  |       |      |       |       |       |      |       |       |       |       |       |       |
|                                         | Practice                 | 13.78  | 1.44  | 1.64 | 1.47  | 1.34  | 2.31  | 6.49 | 3.45  | 12.29 | 11.15 |       |       | 43.21 |
|                                         | Skills development       | 93.55  |       |      |       |       |       |      |       | 1.68  | 1.10  |       |       | 1.86  |
|                                         | Interpersonal skills     | 92.61  |       |      |       |       |       |      |       | 1.38  | 1.69  |       |       |       |
|                                         | Conflict                 | 1.02   | 4.62  | 1.50 | 2.09  | 2.87  | 2.74  | 2.30 | 1.07  | 3.80  | 71.70 | 2.09  |       | 3.38  |
|                                         | Coping strategies        | 6.55   | 2.69  | 2.72 | 9.16  | 2.98  | 2.88  | 4.38 | 6.78  | 14.28 | 23.13 | 1.49  | 4.12  | 18.82 |
| Social / Professional Role and Identity | Identity                 |        |       | 1.80 | 87.43 |       |       | 1.11 |       | 1.44  | 2.62  |       |       | 1.18  |
|                                         | Professional identity    |        | 90.27 |      |       |       |       |      |       | 1.13  | 3.07  |       |       |       |
|                                         | Professional boundaries* |        | 94.28 |      |       |       |       |      |       |       | 2.54  |       |       |       |
|                                         | Professional role*       |        | 96.13 |      |       |       |       |      |       |       | 1.39  |       |       |       |
|                                         | Group identity*          |        |       |      |       |       |       |      |       |       |       | 99.81 |       |       |
|                                         | Social identity*         |        |       |      | 1.81  |       |       |      |       | 1.73  | 2.55  | 87.77 |       | 1.26  |
|                                         | Social norms*            |        |       |      |       |       |       |      |       |       |       | 99.74 |       |       |
|                                         | Group norms*             |        |       |      |       |       |       |      |       |       |       | 99.98 |       |       |
|                                         | Alienation*              |        |       |      |       |       |       |      |       |       |       | 99.25 |       |       |
| Organisational commitment*              |                          | 95.42  |       |      |       |       |       |      |       | 1.30  |       |       |       |       |

| Original Domain                     | Construct                     | Skills | SPRI  | BaCa  | Opt.  | BaCo  | Rein. | Int. | Goals | MADP  | EC    | SI   | Emot. | BR    |
|-------------------------------------|-------------------------------|--------|-------|-------|-------|-------|-------|------|-------|-------|-------|------|-------|-------|
|                                     | Feedback                      |        |       |       |       |       | 3.43  |      | 1.09  | 2.03  | 2.76  |      |       | 86.91 |
|                                     | Change management             |        | 89.32 |       |       |       |       |      |       | 1.18  | 4.27  |      |       | 1.34  |
| Beliefs about Capabilities          | Self efficacy                 |        |       | 99.92 |       |       |       |      |       |       |       |      |       |       |
|                                     | Control of behaviour          | 7.59   | 9.43  | 11.01 | 3.63  | 2.83  | 1.75  | 6.98 | 3.45  | 10.65 | 32.41 | 1.56 | 1.43  | 7.30  |
|                                     | Perceived competence          |        |       | 99.92 |       |       |       |      |       |       |       |      |       |       |
|                                     | Self confidence               |        |       | 99.63 |       |       |       |      |       |       |       |      |       |       |
|                                     | Professional confidence       |        | 8.53  | 78.56 | 1.10  | 1.02  |       | 1.35 |       | 1.53  | 4.23  |      |       | 1.07  |
|                                     | Empowerment                   | 18.67  | 6.86  | 5.41  | 3.25  | 2.54  | 5.00  | 4.78 | 5.10  | 10.76 | 24.57 | 2.38 | 1.19  | 9.49  |
|                                     | Self-esteem                   |        |       | 82.65 | 10.04 |       |       |      |       | 1.11  | 1.42  |      |       |       |
|                                     | Perceived behavioural control |        |       | 99.13 |       |       |       |      |       |       |       |      |       |       |
|                                     | Optimism                      |        |       |       | 99.93 |       |       |      |       |       |       |      |       |       |
|                                     | Pessimism                     |        |       |       | 99.54 |       |       |      |       |       |       |      |       |       |
| Beliefs about Consequences          | Outcome expectancies          |        |       |       |       |       | 99.46 |      |       |       |       |      |       |       |
|                                     | Anticipated regret*           | 1.68   | 2.06  | 1.92  | 11.20 | 17.83 | 6.33  | 6.07 | 3.51  | 14.66 | 21.53 | 1.49 | 2.48  | 9.22  |
|                                     | Appraisal                     | 2.07   | 1.99  | 2.14  | 4.23  | 9.58  | 4.16  | 4.40 | 2.64  | 34.29 | 13.87 | 1.22 | 2.30  | 17.10 |
|                                     | Evaluation                    | 1.80   | 1.42  |       |       | 1.00  | 2.00  | 1.39 | 1.24  | 11.59 | 4.58  |      |       | 72.65 |
|                                     | Review                        | 1.16   |       |       |       |       |       |      |       | 3.49  | 1.74  |      |       | 89.50 |
|                                     | Consequents                   |        |       |       |       |       | 87.80 | 1.41 |       | 1.24  | 3.21  |      |       | 2.81  |
|                                     | Attitudes                     |        |       |       |       |       | 99.87 |      |       |       |       |      |       |       |
|                                     | Contingencies                 |        |       |       |       |       | 91.98 |      |       |       | 2.94  |      |       | 1.62  |
|                                     | Reinforcement                 |        |       |       |       |       | 97.02 |      |       |       |       |      |       | 1.59  |
|                                     | Punishment                    |        |       |       |       |       | 99.63 |      |       |       |       |      |       |       |
|                                     | Incentives                    |        |       |       |       |       | 99.82 |      |       |       |       |      |       |       |
|                                     | Beliefs                       |        |       |       |       |       | 99.87 |      |       |       |       |      |       |       |
|                                     | Unrealistic optimism          |        |       |       | 96.72 |       |       |      |       |       |       |      |       |       |
|                                     | Sensitisation                 |        | 1.26  |       | 1.33  |       | 12.18 | 2.62 | 1.14  | 8.22  | 9.43  |      |       | 59.98 |
| Salient events / critical incidents | 1.42                          | 1.56   | 1.85  | 6.81  | 4.93  | 2.96  | 3.25  | 2.43 | 7.88  | 59.15 |       | 1.18 | 5.64  |       |



| Original Domain | Construct                      | Skills | SPRI  | BaCa | Opt.  | BaCo | Rein. | Int.  | Goals | MADP  | EC    | SI    | Emot. | BR    |
|-----------------|--------------------------------|--------|-------|------|-------|------|-------|-------|-------|-------|-------|-------|-------|-------|
|                 | Social Pressure                |        |       |      |       |      |       |       |       |       |       | 99.90 |       |       |
|                 | Power                          | 5.55   | 34.08 | 3.61 | 2.59  | 2.04 | 1.57  | 3.90  | 2.05  | 9.45  | 16.81 | 11.23 | 1.22  | 5.90  |
|                 | Hierarchy                      |        | 69.20 |      |       |      |       | 1.04  |       | 1.57  | 5.08  | 17.58 |       | 1.36  |
|                 | Management commitment          |        | 98.00 |      |       |      |       |       |       |       |       |       |       |       |
|                 | Supervision                    |        | 92.76 |      |       |      |       |       |       |       | 2.84  |       |       |       |
|                 | Intergroup Conflict            |        | 1.07  |      |       |      |       |       |       |       | 1.44  | 95.87 |       |       |
|                 | Champions / To champion        | 2.14   | 41.33 | 2.85 | 2.87  | 2.11 | 2.27  | 7.17  | 3.19  | 7.18  | 17.68 | 3.53  | 1.58  | 6.12  |
|                 | Social comparisons             |        |       |      |       |      |       |       |       |       |       | 98.65 |       |       |
|                 | Crew resource management       |        | 91.79 |      |       |      |       |       |       |       | 3.59  |       |       |       |
|                 | Negotiation                    | 3.08   | 23.01 | 1.98 | 2.74  | 2.16 | 4.13  | 4.50  | 5.30  | 8.01  | 26.48 | 5.07  | 1.38  | 12.15 |
|                 | Learning                       |        |       |      |       |      |       |       |       | 2.13  | 1.10  |       |       | 93.52 |
|                 | Modelling                      | 2.27   | 4.69  | 1.33 | 1.86  | 2.17 | 4.90  | 3.55  | 2.28  | 6.99  | 12.29 | 16.60 | 1.19  | 39.85 |
|                 | Affect                         |        |       |      |       |      |       |       |       |       |       |       |       | 98.32 |
|                 | Stress                         |        |       |      |       |      |       |       |       |       |       |       |       | 99.02 |
|                 | Fear                           |        |       |      |       |      |       |       |       |       |       |       |       | 99.38 |
|                 | Burn-out                       |        |       |      |       |      |       |       |       |       |       |       |       | 97.73 |
|                 | Cognitive overload / tiredness | 1.45   | 1.41  | 1.17 | 2.09  | 1.72 |       | 1.99  | 1.36  | 46.90 | 9.46  |       | 27.95 | 3.05  |
|                 | Threat                         | 1.72   | 3.38  | 2.15 | 11.47 | 8.24 | 7.49  | 4.26  | 1.92  | 9.12  | 28.64 | 2.28  | 13.69 | 5.64  |
|                 | Positive / negative affect     |        |       |      |       |      |       |       |       |       |       |       |       | 99.25 |
|                 | Anxiety                        |        |       |      |       |      |       |       |       |       |       |       |       | 99.99 |
|                 | Depression                     |        |       |      |       |      |       |       |       |       |       |       |       | 99.96 |
|                 | Implementation intention       |        |       |      |       |      |       | 5.07  | 87.44 | 1.27  | 1.74  |       |       | 2.07  |
|                 | Action planning                |        |       |      |       |      |       | 2.34  | 89.06 | 1.36  | 1.87  |       |       | 2.72  |
|                 | Self-monitoring                |        |       |      |       |      |       | 1.81  | 2.18  | 1.70  | 2.38  |       |       | 88.67 |
|                 | Generating alternatives        | 5.20   | 1.66  | 1.39 | 1.29  | 1.11 | 1.73  | 2.28  | 6.68  | 14.53 | 14.60 | 1.07  |       | 47.73 |
|                 | Moderators of the IB gap       | 1.76   | 2.46  | 1.55 | 3.25  | 2.07 | 6.44  | 25.25 | 19.37 | 5.10  | 23.67 | 1.36  | 1.07  | 6.64  |
|                 | Project management             |        | 74.26 |      | 1.05  |      |       | 2.20  | 2.12  | 3.05  | 9.72  |       |       | 2.33  |

| <b>Original Domain</b>   | <b>Construct</b>            | <b>Skills</b> | <b>SPRI</b> | <b>BaCa</b> | <b>Opt.</b> | <b>BaCo</b> | <b>Rein.</b> | <b>Int.</b> | <b>Goals</b> | <b>MADP</b> | <b>EC</b> | <b>SI</b> | <b>Emot.</b> | <b>BR</b> |
|--------------------------|-----------------------------|---------------|-------------|-------------|-------------|-------------|--------------|-------------|--------------|-------------|-----------|-----------|--------------|-----------|
| Nature of the Behaviours | Barriers and facilitators   | 1.85          | 1.47        | 1.96        | 1.24        | 1.64        | 2.64         | 3.13        | 3.22         | 5.14        | 71.51     |           |              | 4.83      |
|                          | Routine / automatic / habit | 2.44          | 2.96        | 1.87        | 2.81        | 2.58        | 10.61        | 7.16        | 5.94         | 21.37       | 15.81     | 1.85      | 1.80         | 22.80     |
|                          | Breaking habit              | 1.87          | 1.57        | 1.66        | 1.49        | 1.37        | 3.64         | 6.17        | 5.00         | 8.28        | 8.35      |           |              | 59.05     |
|                          | Direct experience           | 1.04          |             |             | 1.07        |             | 2.50         | 1.54        | 1.19         | 5.27        | 7.78      |           |              | 76.75     |
|                          | Past behaviour              | 2.37          | 2.58        | 2.01        | 3.27        | 5.12        | 13.37        | 10.42       | 4.72         | 13.24       | 20.70     | 1.35      | 1.46         | 19.37     |
|                          | Representation of tasks     | 3.18          | 1.79        | 2.86        | 4.05        | 5.18        | 1.23         | 3.49        | 41.71        | 16.77       | 10.75     |           |              | 7.08      |
|                          | Stages of change model      |               | 1.04        |             | 1.02        | 1.10        | 1.11         | 80.95       | 2.18         | 2.67        | 4.26      |           |              | 2.83      |
